# Supplementary material
Source: PubMed Central journal article supplement (PMC7214121)

**Figure E1.** Gating strategy to identify human peripheral blood MAIT cells. Human peripheral blood MAIT cells were identified by APC-conjugated human MR1 5-OP-RU tetramer. MR1 6-FP tetramer was used as negative controls.

**Figure E2.** Generation of *Mr1*<sup>-/-</sup> mice.

**A.** Targeting strategy for generation of constitutive knockout *Mr1*<sup>-/-</sup> mice via CRISPR/Cas9-mediated gene editing. The targeting strategy is based on NCBI transcript NM\_008209.4. Exon 1 contains the translation initiation codon. The Cas9 protein along with the proximal and distal guide RNAs (gRNAs) has been injected into C57BL/6NTac zygotes. The constitutive Knock-Out allele is obtained after CRISPR/Cas9-mediated gene editing. Deletion of exons 1 to 4 and approx. 1.5 kb of sequence upstream of exon 1 (promoter region) results in the loss of function of the *Mr1* gene by preventing transcription of the *Mr1* mRNA and by deleting most of the gene. **B.** Locations and sequences of the proximal and distal gRNAs. **C.** qPCR results indicating absence of *Mr1* expression is absent in all the tissues that we have examined, including lung, liver and thymus, of *Mr1*<sup>-/-</sup> mice. **D.** Flow cytometry profiles indicating that MAIT cells are absent in the thymus and liver of *Mr1*<sup>-/-</sup> mice.

**Figure E3.** MAIT cells restrain allergic airway inflammation.

**A.** Mouse lung ILC2 were identified as CD45<sup>+</sup>Lin<sup>-</sup>Thy1<sup>+</sup>T1/ST2<sup>+</sup> cells. **B.** Mean fluorescence intensity (MFI) for Ki67 in lung ILC2 of *Mr1*<sup>-/-</sup> or control wildtype mice challenged with *Alternaria* extracts or PBS every other day for 3 days. **C.** Concentrations of IL-5 and IL-13 in the lung homogenate of *Mr1*<sup>-/-</sup> or control wildtype mice challenged with *Alternaria* extracts or PBS every other day for 3 days. **D.** Number of total ILC2, IL-5<sup>+</sup> ILC2, and IL-13<sup>+</sup> ILC2 in the lungs of *Mr1*<sup>-/-</sup> or control wildtype mice challenged with house dust mite (HDM) extracts or PBS daily for 5 days. **E.** The number of eosinophils in the bronchoalveolar lavage fluid of *Mr1*<sup>-/-</sup> or control wildtype mice challenged with house dust mite (HDM) extracts or PBS daily for 5 days. **F.** Total number of ILC2 in the lungs of *Rag1*<sup>-/-</sup> mice treated with PBS or *Alternaria* extracts, with or without MAIT cell transfer. **G.** Representative flow cytometry profile of MAIT cells in the lungs of *Mr1*<sup>-/-</sup> mice that received intravenous transfer of MAIT cells or PBS. **H.** 5000 sorted mouse lung ILC2 were cultured with IL-7, IL-2, and IL-33 5 days, in the presence or absence of IL4I1. Cell growth was calculated as fold change of cell number over 5 days of culture. **I.** Ki67 expression was examined by intracellular staining. MFI of Ki67 in cultured cells was shown. **J.** IL-13 expression was examined by intracellular staining. Data are from 4-6 mice per group, representative of two independent experiments.

Figure E1

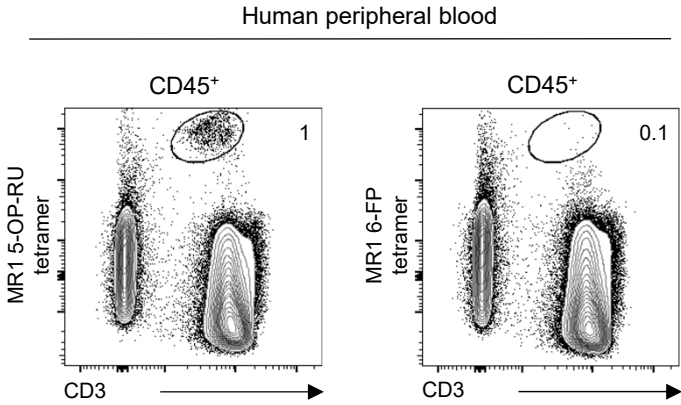

**Figure E2**

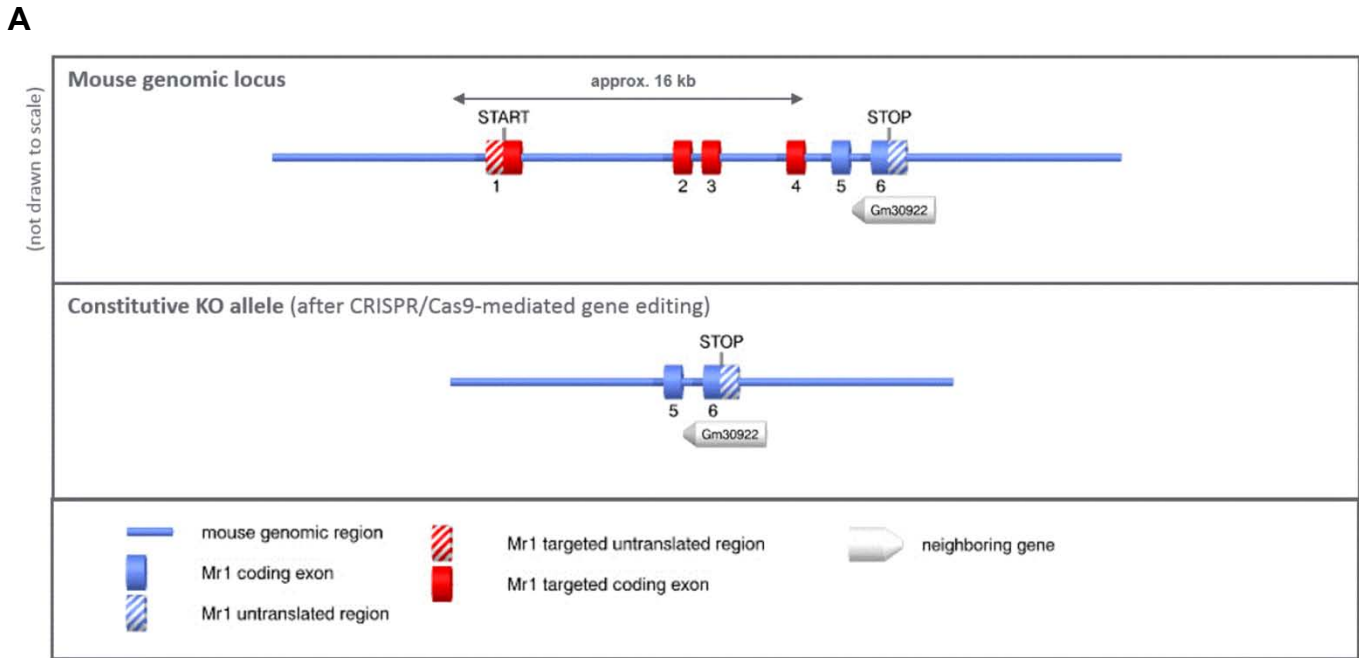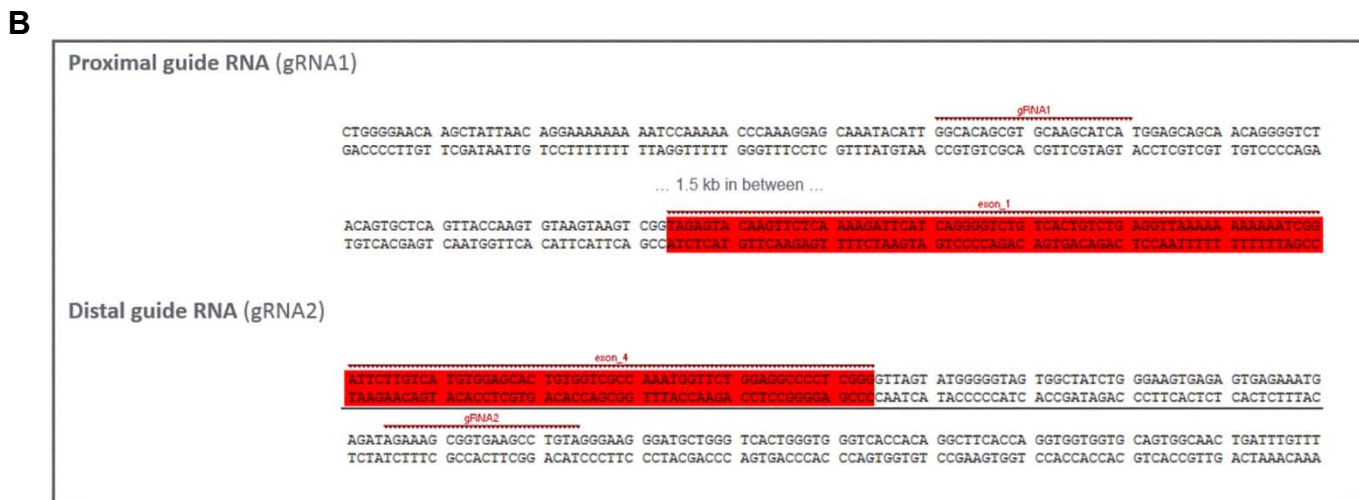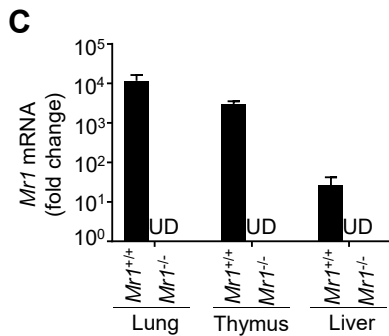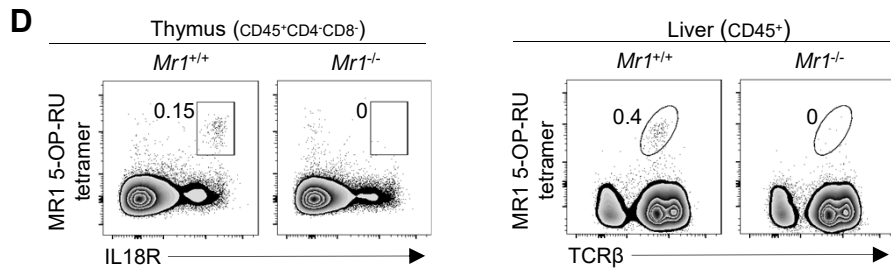

**Figure E3**

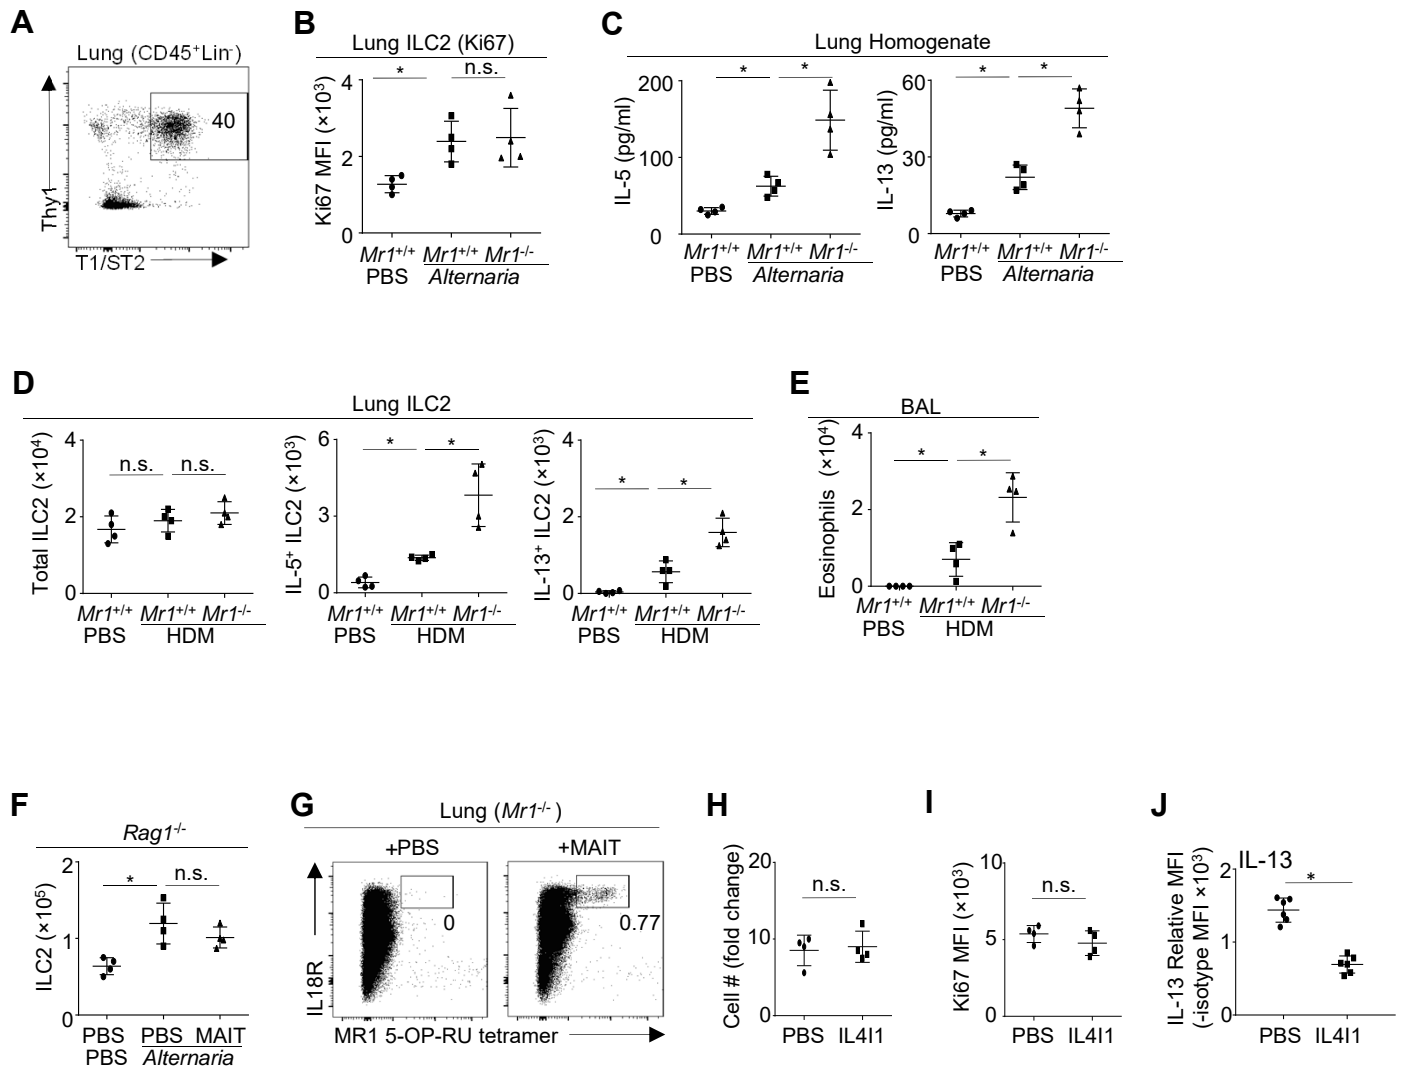

Supplement: NIHMS1569478-supplement-1.pdf [file NIHMS1569478-supplement-1.pdf]
